# Supplementary material for: Combined near-IR photothermal therapy and chemotherapy using gold-nanorod/chitosan hybrid nanospheres to enhance the antitumor effect
Source: Royal Society of Chemistry journal article supplement (doi:10.1039/c2bm00138a), 2012-11-06
Supplement: c2bm00138a.pdf [file c2bm00138a.pdf]

Supporting Information

**Combined Near-IR Photothermal Therapy and Chemotherapy Using  
Gold-Nanorod/Chitosan Hybrid Nanospheres to Enhance Antitumor Effect**

Rui Chen, Xianchuang Zheng, Hangqing Qian, Xin Wang, Jing Wang, Xiqun Jiang\*

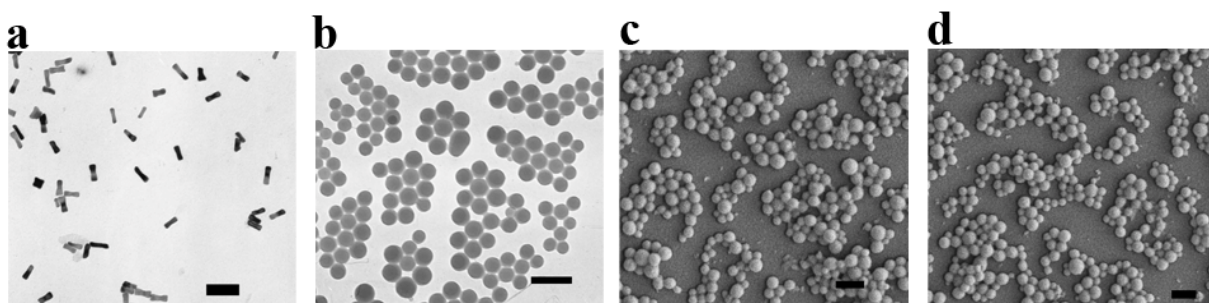

**Fig. S1** TEM images of (a) AuNR (scale bar = 100 nm) and (b) CS NSs (bar = 200 nm); SEM images of (c) CS NSs (bar = 200 nm) and (d) CS-AuNR NSs (bar = 200 nm).

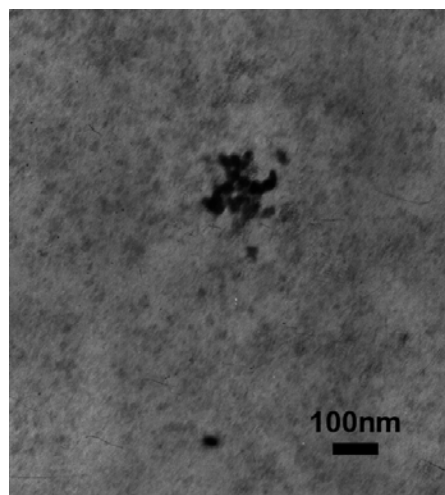

**Fig. S2** TEM image of tumor tissue at 8 h after i.v. injection of CS-AuNR NSs.

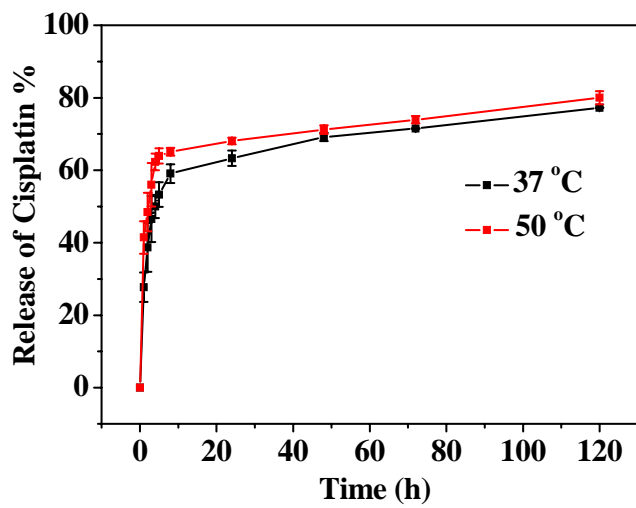

**Fig. S3** Cumulative cisplatin release profile from CS-AuNR NSs in PBS with pH 7.4 at 37°C and 50°C.

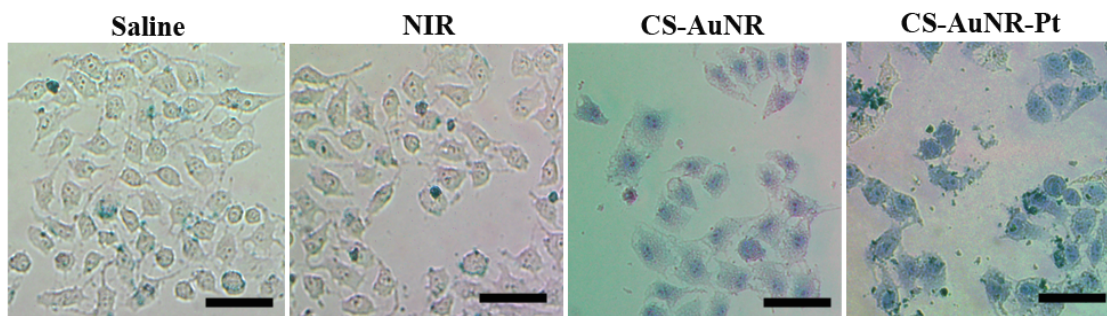

**Fig. S4** Microscopic images of HeLa cells incubated with different NSs and exposed to laser at 10 W/cm<sup>2</sup> for 3 min. Cells were stained with trypan blue (0.4%) and scale bar=20μm.

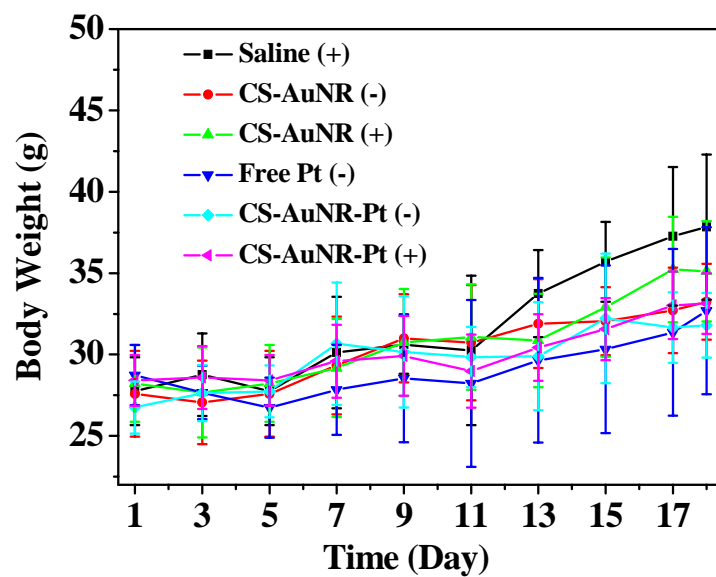

Fig. S5. Mean body weights of mice with different treatment.

**Table S1** The DLS data of CS-AuNR NSs at different medium.

| Samples     | Size (polydispersity) |
|-------------|-----------------------|
| water       | 120.2 nm (0.058)      |
| DMEM        | 125.0 nm (0.131)      |
| blood serum | 129.8 nm (0.151)      |

**Table S2** Hematology analysis and blood biochemical assay.

|                            | <b>CS-AuNR</b> | <b>AuNR</b> | <b>Saline</b> |
|----------------------------|----------------|-------------|---------------|
| WBC ( $10^9/L$ )           | 4.2±0.4        | 4.2±0.3     | 4.6±1.4       |
| RBC ( $10^{12}/L$ )        | 10.3±0.6       | 9.2±0.4     | 10.0±0.4      |
| LY (%)                     | 85.1           | 88.6±2.6    | 84.9          |
| GR (%)                     | 7.9            | 5.4         | 8.0           |
| MO (%)                     | 2.9 ±0.8       | 1.3±0.5     | 2.5 ±0.4      |
| HGB (g/L)                  | 141.5±9.5      | 147±10      | 142±0.5       |
| MCV (fl)                   | 49.3±0.5       | 49.7±1.2    | 49.6±1.3      |
| MCH (pg)                   | 15.8±0.1       | 15.9±0.3    | 15.8±0.7      |
| MCHC (g/L)                 | 320±3          | 320.5±1.5   | 318±5         |
| MPV (fl)                   | 49.3±0.5       | 45.6±3.0    | 44.6±0.9      |
| PLT ( $10^9/L$ )           | 1097±41        | 1068±80     | 1072±82       |
| AST (U/L)                  | 138.5±17.4     | 143.1±4.6   | 134.7±1.7     |
| ALT (U/L)                  | 43.3±1.0       | 53.0±8.9    | 41.0±2.3      |
| TBIL ( $\mu\text{mol/L}$ ) | 0.3            | 0.2         | 0.5           |
| CRE (mmol/L)               | 7±0            | 7.5 ±0.5    | 6.5±1         |
| BUN ( $\mu\text{mol/L}$ )  | 10±0.7         | 10.1±0.2    | 10.1±0.5      |
